## Receptor interacting protein-2 contributes to host defense against *Anaplasma phagocytophilum* infection

Bindu Sukumaran<sup>1</sup>, Yasunori Ogura<sup>2</sup>, Joao H. F. Pedra<sup>1</sup>, Koichi S. Kobayashi<sup>2</sup>, Richard A. Flavell<sup>2,3</sup> & Erol Fikrig<sup>1,3</sup>

<sup>1</sup>Section of Infectious Diseases, Department of Internal Medicine, Yale University School of Medicine, New Haven, CT, USA; <sup>2</sup>Department of Immunobiology, Yale University School of Medicine, New Haven, CT, USA; and <sup>3</sup>Howard Hughes Medical Institute, Yale University School of Medicine, New Haven, CT, USA

**Correspondence:** Bindu Sukumaran, Program in Emerging Infectious Diseases, Duke-NUS Graduate Medical School, 8 College Road, Singapore City 169857, Singapore.  
Tel.: +65 66 011 453; fax: +65 62 212 529; e-mail: bindu.sukumaran@duke-nus.edu.sg

**Present addresses:** Yasunori Ogura, Department of Food Science and Nutrition, Nara Women's University, Nara, 6308506, Japan  
Joao H. F. Pedra, Department of Entomology and Center for Disease Vector Research, University of California-Riverside, Riverside, CA, 92521, USA  
Koichi S. Kobayashi, Department of Cancer Immunology & AIDS, Dana-Farber Cancer Institute, Harvard Medical School, Boston, MA, 02215, USA

Received 4 April 2012; revised 18 June 2012; accepted 18 June 2012.  
Final version published online 23 July 2012.

DOI: 10.1111/j.1574-695X.2012.01001.x

Editor: Peter Timms

### Keywords

Rip2; *Anaplasma phagocytophilum*; NLR; IFN $\gamma$ .

### Introduction

The tick-borne obligate intracellular Gram-negative bacterium *Anaplasma phagocytophilum* primarily colonizes within human neutrophils and causes the illness human granulocytic anaplasmosis (Carlyon & Fikrig, 2003). The infected individuals may develop a range of symptoms from mild to severe and include fever, malaise, headache, septic shock-like syndromes, hemorrhage, coagulopathy,

### Abstract

The Gram-negative obligate intracellular bacterium *Anaplasma phagocytophilum* is the causative agent of human granulocytic anaplasmosis (HGA), an emerging tick-borne infectious disease occurring worldwide. HGA is generally self-limiting; however, the underlying mechanisms, particularly the innate immune pathways that mediate the immune clearance of *A. phagocytophilum*, are less understood. We herein report an unexpected role for Receptor interacting protein-2 (Rip2), the adaptor protein for the Nod-like receptors (NLRs), Nod1/Nod2, in the host immune response against *A. phagocytophilum* infection. Although *A. phagocytophilum* genome is reported to lack the genes encoding the known ligands of Nod1 and Nod2, its infection upregulated the transcription of Rip2 in human primary neutrophils. Our results revealed that Rip2-deficient mice had significantly higher bacterial load than wild-type controls throughout the infection period. In addition, the Rip2-deficient mice took strikingly longer duration to clear *A. phagocytophilum* infection. Detailed analysis identified that interferon gamma (IFN $\gamma$ ) and interleukin (IL)-18 but not IL-12, macrophage inflammatory protein-2, and KC response were diminished in *A. phagocytophilum*-challenged Rip2-deficient mice. Together, these results revealed that Rip2 plays important roles in the immune control of *A. phagocytophilum* and may contribute to our understanding of the host response to Rickettsiales.

respiratory distress syndrome, acute abdominal syndromes, acute renal failure, heart failure and myocarditis, opportunistic infections, and neuropathies (Bakken & Dumler, 2000). Thrombocytopenia and leucopenia are common in *A. phagocytophilum*-infected individuals. The infection can become fatal in aged- and immune-compromised subjects.

Although *A. phagocytophilum* is among the most prevalent tick-borne pathogens in the USA (von Loewenich

*et al.*, 2004), how this bacterium interacts with mammalian immune system is still unclear. Generally, the *A. phagocytophilum* infection is self-limiting in immunocompetent subjects (Dumler *et al.*, 2005). The laboratory model for *A. phagocytophilum* infection is mouse, which often clears infection within 10–12 days (Sun *et al.*, 1997; Hodzic *et al.*, 1998; Borjesson & Barthold, 2002). Both T and B cells have been shown to play important roles in the control and clearance of *A. phagocytophilum* (Telford *et al.*, 1996; Bunnell *et al.*, 1999; von Loewenich *et al.*, 2004). A key role for CD4<sup>+</sup> T cells and T-helper 1 (Th1) response is widely established in the immune response to the infection of *A. phagocytophilum* (Pedra *et al.*, 2007a, b; Birkner *et al.*, 2008). It has been shown that interferon gamma (IFN $\gamma$ ), IL-12, and IL-18 play important roles in the early clearance of *A. phagocytophilum* (Akkoyunlu & Fikrig, 2000; Pedra *et al.*, 2007a, b). Immune effector components such as iNOS and phagocyte NADPH oxidase were dispensable for the *in vivo* clearance of *A. phagocytophilum* infection (Banerjee *et al.*, 2000). Although some of the critical players of adaptive response required for controlling *A. phagocytophilum* are known, our understanding of the innate immune components involved in the recognition and clearance of this bacterium is rather incomplete. Interestingly, prominent anti-bacterial innate immune detection system tool-like receptor (TLR)2, TLR4, and their adaptor MyD88 are shown to play no role in the immune response to *A. phagocytophilum* infection (von Loewenich *et al.*, 2004). A recent study demonstrated that signaling through the Nod-Like Receptor (NLR) family member NLRC4 (also known as IPAF/ICE Protease-Activating Factor), its adaptor ASC, and Caspase-1 is critical for the control of *A. phagocytophilum* infection during the early phase of infection (Pedra *et al.*, 2007a, b). However, mice deficient in NLRC4, ASC, and Caspase-1 were still able to clear *A. phagocytophilum* infection by day 6, indicating there are additional pathogen detection and clearance systems involved in the innate and adaptive immune response to *A. phagocytophilum* infection. Thus, the mechanisms involved in the immune detection and clearance of *A. phagocytophilum* remain unresolved and warrant more studies.

We previously reported that *A. phagocytophilum* infection upregulates Rip2 (Sukumaran *et al.*, 2005), the adaptor molecule of the cytoplasmic pattern recognition receptor (PRR) Nod1 and 2, (Magalhaes *et al.*, 2011) in immune cells. Nod1 and 2 belong to NLR family of proteins and are known to detect bacterial membrane-derived peptidoglycan components iE-DAP and muramyl dipeptide (MDP), respectively (Inohara & Nunez, 2003; Franchi *et al.*, 2009). Following peptidoglycan detection, Nod1/Nod2 recruit and associate with the adaptor protein Rip2, triggering proinflammatory signaling pathways via NF- $\kappa$ B

and the mitogen-activated protein kinases p38, JNK, and ERK (Kobayashi *et al.*, 2002). Activation of Nod1 and Nod2 also triggers proinflammatory responses, leading to the induction of cytokine and chemokines. Interestingly *A. phagocytophilum* genome does not encode genes for the synthesis of iE-DAP and MDP (Dunning Hotopp *et al.*, 2006). Therefore, it is intriguing that Rip2 is activated during *A. phagocytophilum* infection. We hypothesized that Rip2 may play a role in the immune response to *A. phagocytophilum*, through a potentially unknown mechanism. In this study, we investigated whether Rip2 plays any role in *A. phagocytophilum* infection clearance and demonstrate that Rip2 plays an unexpected role in controlling the *A. phagocytophilum* infection.

## Materials and methods

### *Anaplasma phagocytophilum* propagation

The *A. phagocytophilum* HZ strain (Prof. Yasuko Rikihisa, Ohio State University) was used in this study (Sukumaran *et al.*, 2005). The *A. phagocytophilum* was propagated in the promyelocytic cell line (HL-60; ATCC, 240 CCL; Sukumaran *et al.*, 2005). A previously reported method was used to propagate and purify *A. phagocytophilum* (Carlyon *et al.*, 2004). Briefly, equal volume of *A. phagocytophilum*-infected and *A. phagocytophilum*-uninfected HL-60 cells were mixed and diluted 1/5 with RPMI 1640 medium with 10% fetal bovine serum. For the purification of cell-free *A. phagocytophilum*, maximally infected cells were pelleted by centrifugation for 10 min at 400 g, lysed first by six passage through a 25-gauge needle, followed by another six passages through a 27-gauge needle. After lysis, the cell debris was removed by centrifugation at 300 g for 5 min, and the supernatant containing host cell free bacterium was used for the *in vitro* (human neutrophils) and *ex vivo* (mouse splenocytes) infection studies.

### Infection of neutrophils with *A. phagocytophilum* *in vitro*

The infection of neutrophils was made as reported earlier (Sukumaran *et al.*, 2005). Briefly, suspensions of freshly prepared *A. phagocytophilum* (isolated from  $5 \times 10^6$  heavily infected HL-60 cells) were added to neutrophils ( $10^6$  neutrophils mL<sup>-1</sup>) maintained in the ultra-low attachment six-well plates (Corning Inc., NY) and incubated at 37 °C in 5% CO<sub>2</sub> for 4 h. The percentage of infected neutrophils was confirmed by immunofluorescence microscopy, and the number of *A. phagocytophilum* isolates per neutrophil was calculated as previously described (Carlyon *et al.*, 2004). The ratio of bacteria to neutrophils was ~5 : 1. At various time points post-infection, the cells

were recovered by centrifugation at 210 g, RNA was isolated using RNeasy kit (Qiagen) and cDNA was made using iSCRIPT kit (Biorad). The Rip2 levels were determined by SYBR Green dye-based quantitative real-time PCR (qRT-PCR), with primers detecting Rip2 (GenBank accession AF064824), and normalized with human  $\beta$  actin gene. Rip2 was amplified using the following primers: Forward: 5'-CCATCCCGTACCACAAGCTC-3' and Reverse: 5'-GCAGGATGCGGAATCTCAAT-3'. The primers used for amplifying human  $\beta$  actin gene were as follows: Forward: 5'-TGATATCGCCGCGCTCGTCGTC-3' and Reverse: 5'-GCCGATCCACACGGAGTACT-3'.

### Infection of mice and quantification of *A. phagocytophilum* in the peripheral blood

Wild-type C57BL/6, mice were purchased from Jackson Laboratory (Bar Harbor, ME). Rip2 null mice (backcrossed to C57BL/6 for at least 10 generations) have been previously described (Kobayashi *et al.*, 2002, 2005). For the *in vivo* infection, 4–12 weeks age, sex matched, and mice maintained under specific pathogen-free conditions (such as maintenance in barrier-filtered cages, given standard laboratory diet, and sterile water *ad libitum* throughout the study) were used. The experiments were carried out according to the guidelines of the Yale University institutional animal care and research committee.

For the *in vivo* infection studies, 100  $\mu$ L of blood from *A. phagocytophilum* HZ strain-infected *rag1*-null mice (25% neutrophil infection) was used as the inoculum to infect immunocompetent C57BL/6 or Rip2<sup>-/-</sup> mice, by intra peritoneal injection. To determine the infection level in *rag1*-null mice, Giemsa staining of the blood cells was performed, followed by quantification of the percentage of granulocytes containing morulae (*A. phagocytophilum* aggregates; Borjesson & Barthold, 2002).

For the quantification of the *A. phagocytophilum* level in the peripheral blood, 100  $\mu$ L of peripheral blood from mice was incubated twice with 900  $\mu$ L of erythrocyte lysis buffer (Sigma-Aldrich) at room temperature for 20 min, followed by DNA extraction using DNeasy Tissue Kit (Qiagen). The bacterial levels were determined by SYBR Green dye-based qRT-PCR, with primers detecting *A. phagocytophilum* 16S rRNA gene (GenBank accession M73224), and normalized with mouse actin gene (GenBank accession X03672) as described before (Pedra *et al.*, 2007a, b). Mouse actin was amplified using the following primers: Forward: 5'-AGAGGGAAATCGTGCGTGAC-3' and Reverse: 5'-CAATAGTGATGACCTGGCCGT-3'. The primers used to amplify the 16S rRNA gene of *A. phagocytophilum* were as follows: Forward: 5'-CCATTCTAG TGGCTATCCCATACTAC-3' and Reverse: 5'-TCGAAC GGATTATCTTTATAGCTTG-3'.

### Measurement of cytokines

The protein standards and antibody pairs for IL-12p40/p70, IL-2, macrophage inflammatory protein-2 (MIP-2), KC, and IFN $\gamma$  were purchased from BD Pharmingen, and IL-18 from MBL. Retro-orbital bleeding was performed at the desired time points from wild-type and Rip2<sup>-/-</sup> mice, and the ELISA experiments for cytokine measurement were carried out as described previously (Sukumaran *et al.*, 2005).

### *Anaplasma phagocytophilum* restimulation assays

For the *ex vivo* splenocyte restimulation assays, the spleens were first removed from euthanized mice 6 days post-infection with *A. phagocytophilum*. The splenocytes (10<sup>6</sup> cells) were prepared following RBC lysis and restimulated with live purified *A. phagocytophilum* (10<sup>8</sup> bacteria) *in vitro* for 18 h, and the culture supernatant was used to perform ELISA for cytokine measurements. *Anaplasma phagocytophilum* was propagated and purified as described in the Materials and methods section. Uninfected spleen cells were used as negative controls.

### Statistical analysis

We performed statistical analysis using unpaired Student's *t*-test. *Anaplasma phagocytophilum* genome copy numbers present in the peripheral blood of wild-type and gene-deficient mice were compared, and values of  $P \leq 0.05$  were considered statistically significant.

## Results

### *Anaplasma phagocytophilum* infection upregulates Rip2 expression

In this study, we first investigated the potential induction of Rip2 by *A. phagocytophilum* in human primary neutrophils. For this, we infected human primary neutrophils with *A. phagocytophilum* and quantified the levels of Rip2 using quantitative real-time PCR (qRT-PCR). As shown in Fig. 1, there was a fourfold increase ( $P < 0.05$ ) in Rip2 transcripts at 4-h post-infection with *A. phagocytophilum*. This observation was consistent with our earlier study. We further determined the time course of the transcription of Rip2. It was observed that, as shown in Fig. 1, up-regulation of Rip2 transcription starts as early as 2-h post-infection and continued to increase over a period of 4 h, and reaches a plateau thereafter. In conclusion, *A. phagocytophilum* infection results in the up-regulation of transcription of Rip2.

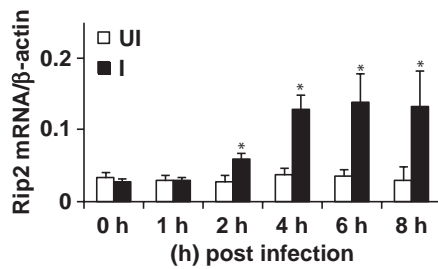

**Fig. 1.** Rip2 transcription is induced during *Anaplasma phagocytophilum* infection. RNAs from 1, 2, 4, 6, and 8 h infected (I) and uninfected (UI) neutrophils were used to perform qRT-PCR. The results are expressed as number of copies of Rip2 mRNA/human  $\beta$ -actin. The results are expressed as mean  $\pm$  SD from three independent experiments. The statistical significance was calculated using Student's *t*-test and  $*P < 0.05$ .

### Rip2 is important for the immune control of *A. phagocytophilum* infection *in vivo*

As we observed an increase in the transcription of Rip2 in *A. phagocytophilum*-infected cells, and Rip2 has a known role in controlling intracellular bacterial infections, we addressed the important question whether Rip2 has any functional role in the immune defense and clearance of *A. phagocytophilum* infection *in vivo*. For this, we infected Rip2<sup>-/-</sup> mice with *A. phagocytophilum* intra-peritoneally, and monitored bacterial load and infection clearance kinetics in the blood using qRT-PCR detecting *A. phagocytophilum* 16S rRNA gene. Previous studies have shown that in the C57BL/6 murine model of *A. phagocytophilum* infection, bacterial load increases from day 2 onwards, reaching peak at 3–4 days, followed by infection decline and clearance by 10–12 days (von Loewenich *et al.*, 2004). Strikingly, genetic deletion of Rip2 noticeably altered *A. phagocytophilum* infection pattern in the mouse model. As shown in Fig. 2, Rip2<sup>-/-</sup> mice showed an increased *A. phagocytophilum* burden, compared with gene sufficient controls. In addition, there was a prominent delay in the kinetics of clearance of *A. phagocytophilum* in the blood of Rip2<sup>-/-</sup> animals, compared with wild-type controls (Fig. 2). In wild-type C57BL/6 mice, *A. phagocytophilum* burden peaked at day 3 and then rapidly declined and there was complete clearance by day 12. In contrast, even though there was comparable bacterial load in Rip2<sup>-/-</sup> and in wild-type mice at day 3, the *A. phagocytophilum* load was consistently higher in Rip2<sup>-/-</sup> mice than in wild-type controls during the entire course of infection following day 3. Contrast to that in wild type, in Rip2<sup>-/-</sup> mice, the *A. phagocytophilum* burden progressively increased with a peak bacterial load reaching at day 7 post-infection, with eightfold ( $P < 0.05$ ) more bacterial load than in wild-type mice. While wild-type animals cleared infection completely by 10–12 days, Rip2<sup>-/-</sup> mice

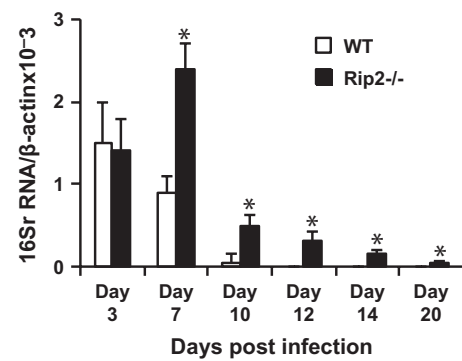

**Fig. 2.** Rip2 deficiency caused increased load and delayed clearance of *Anaplasma phagocytophilum* in peripheral blood of mice. Rip2<sup>-/-</sup> and WT ( $n = 15$ ) mice were infected with *A. phagocytophilum*, and the bacterial load was determined in the peripheral blood (by measuring the levels of bacterial 16S rRNA gene normalized to mouse  $\beta$  actin) at the indicated time points using qRT-PCR analysis as detailed in methods section. The experiment was repeated three times, and the result from a representative experiment is shown. The results are expressed as median  $\pm$  SD. The statistical significance was calculated using Student's *t*-test and  $*P < 0.05$ .

had a very prolonged infection, and the bacteria could be detected even at day 20.

In conclusion, Rip2<sup>-/-</sup> mice showed a significantly higher bacterial load at all time points following day 3 and a prominent delay of infection clearance extending up to day 20. These data identify an unexpected but important role for Rip2 in the immune clearance of *A. phagocytophilum* infection.

### Rip2 is dispensable for the MIP-2 and KC production in response to *A. phagocytophilum* infection

We next sought to find out the impaired immune and inflammatory mechanisms that resulted in the increased susceptibility of Rip2<sup>-/-</sup> mice to *A. phagocytophilum* infection. For this, we first investigated whether Rip2 plays any role in the signature inflammatory host response typically manifested during *A. phagocytophilum* infection, by analyzing the levels of major chemokines and cytokines associated with *A. phagocytophilum* infection (Akkoyunlu & Fikrig, 2000; Akkoyunlu *et al.*, 2001; Pedra *et al.*, 2007a, b) in the knock-out mouse model. One of the key products of human and mouse neutrophils are chemokines. Therefore, we first determined whether Rip2 contributes to the IL-8 chemokine response during *A. phagocytophilum* infection by measuring the levels of murine IL-8 homologues MIP-2 and KC (Scorpio *et al.*, 2004). We infected Rip2<sup>-/-</sup> mice with *A. phagocytophilum* intra-peritoneally and measured the levels of MIP-2 and

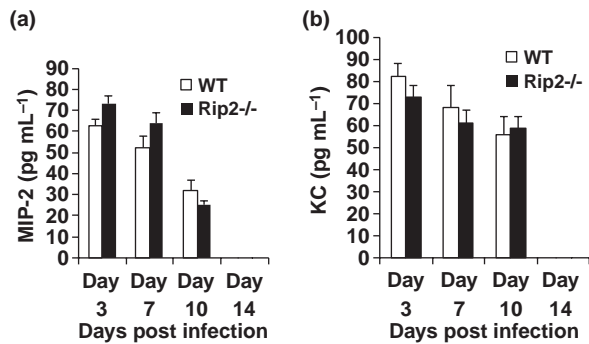

**Fig. 3.** Rip2 is not involved in the MIP-2 and KC response to *Anaplasma phagocytophilum* infection. Sera from wild-type ( $n = 5$ ) or Rip2<sup>-/-</sup> ( $n = 5$ ) mice were harvested at 3, 7, 10, and 14 days post-infection, pooled, and the levels of MIP-2 (a), and KC (b) were measured using ELISA. The results represent mean  $\pm$  SD of samples from three independent experiments. The statistical significance was calculated using Student's *t*-test.

KC, in the mice sera. The results showed that both MIP-2 and KC levels were unaltered in *A. phagocytophilum*-infected Rip2<sup>-/-</sup> mice (Fig. 3a and b) compared with wild-type controls at all time points tested. These results indicate that Rip2 is not involved in the chemokine response during *A. phagocytophilum* challenge.

### Rip2 is required for IL-18 but not IL-12 production during *A. phagocytophilum* challenge

Earlier studies have shown that the pro-inflammatory cytokines such as IL-12 and IL-18 were important components in the immunity against *A. phagocytophilum* infection by inducing optimal production of IFN- $\gamma$  and Th1 immune responses (Pedra *et al.*, 2007a, b). To determine whether Rip2 plays any role in the cytokine response, we studied the serum levels of major NF- $\kappa$ B-dependent cytokine IL-12, and inflammasome-dependent cytokine IL-18, in Rip2-deficient mice following *A. phagocytophilum* challenge. As shown in Fig. 4a, there was no significant difference in the levels of IL-12 in Rip2<sup>-/-</sup> animals. However, *A. phagocytophilum*-infected Rip2<sup>-/-</sup> mice showed a modest but significant reduction (1.78-fold,  $P < 0.05$ ) in IL-18 levels at day 10 (Fig. 4b). This evidence indicates that Rip2 plays a differential role in the cytokine response to *A. phagocytophilum* challenge.

### Rip2 deficiency impairs IFN $\gamma$ production during *A. phagocytophilum* infection

Earlier studies have shown that mice deficient in either the production or signaling of IFN $\gamma$  had a prominent delay in the immune clearance of *A. phagocytophilum*

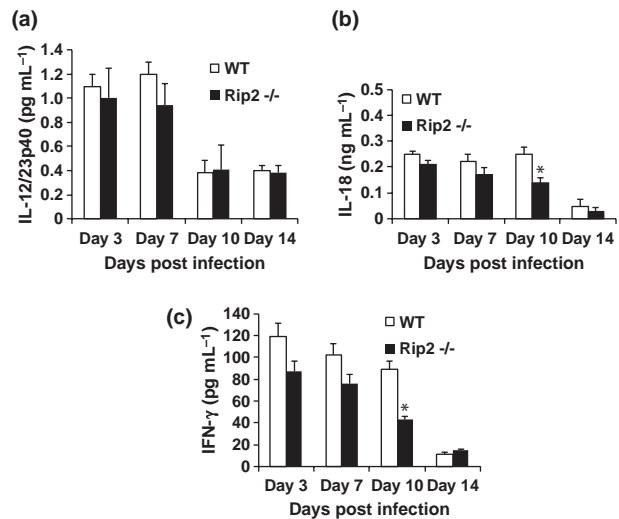

**Fig. 4.** Rip2 deficiency resulted in altered immune response to *Anaplasma phagocytophilum* infection. Sera from wild-type ( $n = 6$ ) or Rip2<sup>-/-</sup> ( $n = 6$ ) mice were harvested at 3, 7, 10, and 14 days post-infection, pooled, and the levels of IL-12 (a), IL-18 (b), and IFN $\gamma$  (c) were measured using ELISA. The results are expressed as mean  $\pm$  SD of samples from three independent experiments. The statistical significance was calculated using Student's *t*-test and \* $P < 0.05$ .

(Akkoyunlu & Fikrig, 2000; Dumler *et al.*, 2000; Lepidi *et al.*, 2000; Martin *et al.*, 2000; Wang *et al.*, 2004; Pedra *et al.*, 2007a, b, 2008; Birkner *et al.*, 2008). Moreover, the level of IL-18 (also known as interferon-gamma inducing factor) was reduced in the serum of Rip2-deficient mice during *A. phagocytophilum* infection. Therefore, we next analyzed whether Rip2 impacts on the IFN $\gamma$  production during *A. phagocytophilum* infection. For this, Rip2<sup>-/-</sup> animals were infected with *A. phagocytophilum*, and the IFN $\gamma$  response was measured. As shown in Fig. 4c, Rip2<sup>-/-</sup> mice displayed significantly reduced IFN $\gamma$  levels in the sera at day 10 post-infection. The IFN $\gamma$  levels in Rip2<sup>-/-</sup> animals were 2.1-fold ( $P < 0.05$ ) less than that in the infected wild-type mice, indicating a potential role for Rip2 in the IFN $\gamma$  response to *A. phagocytophilum*.

To further confirm the role of Rip2<sup>-/-</sup> in the cytokine response to *A. phagocytophilum* infection, we performed *ex vivo* experiments. As Th1-type immune response is important in the immune response to *A. phagocytophilum* infection, we isolated murine splenocytes from infected Rip2-deficient mice, re-stimulated with *A. phagocytophilum* *ex vivo* and measured the levels of IFN $\gamma$  and also IL-2. The results of these experiments identified a reduction in the production of both IFN $\gamma$  (Fig. 5a) and IL-2 (Fig. 5b) by the splenocytes of Rip2<sup>-/-</sup> mice in response to *A. phagocytophilum* infection. When splenocytes from *A. phagocytophilum*-infected wild-type and Rip2<sup>-/-</sup> mice were restimulated, the IFN $\gamma$  response in Rip2<sup>-/-</sup> splenocytes was

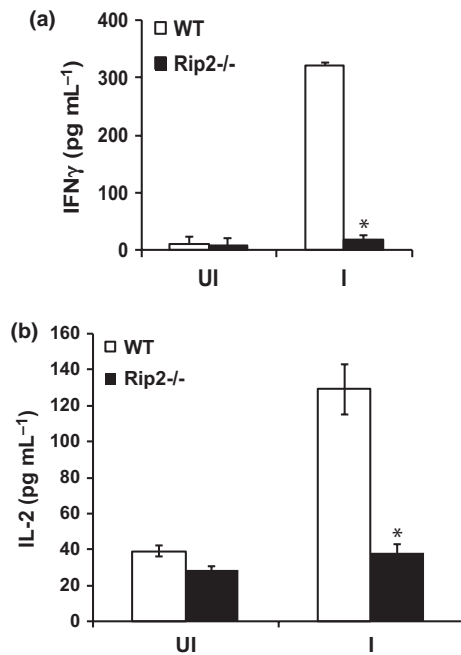

**Fig. 5.** Splenocytes from *Anaplasma phagocytophilum*-infected *Rip2*<sup>-/-</sup> mice have reduced IFN $\gamma$  and IL-2 secretion during restimulation with *A. phagocytophilum*. Splenocytes collected from wild-type ( $n = 5$ ) or *Rip2*<sup>-/-</sup> ( $n = 5$ ) mice were stimulated with live *A. phagocytophilum* for 18 h, and IFN $\gamma$  (a) and IL-2 (b) levels were measured using ELISA. The results are expressed as mean  $\pm$  SD of five mice from each group. The experiment was repeated twice with similar results. The statistical significance was calculated using Student's *t*-test and \* $P < 0.05$ . UI, uninfected samples and I, *A. phagocytophilum*-infected samples.

16.8-fold less than ( $P < 0.05$ ) that in wild-type animals. We also observed a 3.4-fold reduction ( $P < 0.05$ ) in the IL-2 response in *Rip2*<sup>-/-</sup> splenocytes when restimulated with *A. phagocytophilum*. These results collectively identify the notable defect in Th1-like response, in *Rip2*-deficient mice in response to *A. phagocytophilum* infection, indicating that *Rip2* likely acts as a contributor to the immune response against this bacterium.

## Discussion

Although mammals often successfully clear the infection by *A. phagocytophilum*, the underlying innate immune mechanisms, particularly the PRRs and innate immune pathways that initiate its clearance, are still a mystery. A previously published gene microarray-based study from our group analyzing transcriptional response of human neutrophils to *A. phagocytophilum* indicated that the transcription of *Rip2* is upregulated during infection (Sukumaran et al., 2005). Following up on this earlier observation, in this study, we identified that *Rip2*, the

key adaptor molecule mediating signaling from the cytoplasmic PRRs Nod1/2, plays an important role in the control of *A. phagocytophilum* infection.

*Rip2* has been previously shown to play an essential role in the immunity against various intracellular pathogens including *Listeria monocytogenes* (Chin et al., 2002), *Legionella pneumophila* (Archer et al., 2010), *Chlamydo-phila pneumonia* (Shimada et al., 2009), *Mycobacterium tuberculosis* (Shimada et al., 2009), and extracellular pathogens such as *Escherichia coli* (Balamayooran et al., 2011).

Compared with wild-type mice, *Rip2*<sup>-/-</sup> mice were significantly more susceptible to *A. phagocytophilum* infection and had a markedly higher bacterial burden at all time points following day 3 post-infection. The deficiency of *Rip2* also resulted in delayed clearance of *A. phagocytophilum* from the blood in the mouse model. While wild-type mice took 10–12 days to clear *A. phagocytophilum* infection, *Rip2*<sup>-/-</sup> mice took ~20 days to clear infection. Over all the role of *Rip2* became prominent during the early mid-phase of the immune response to *A. phagocytophilum* infection. The fact that the *Rip2* knockout mice were still able to clear the infection suggests that there may be other un-identified pathways that may be important in the clearance of *A. phagocytophilum*.

A major inflammatory chemokine that is heavily induced during *A. phagocytophilum* infection is IL-8 in humans (Akkoyunlu et al., 2001) and murine IL-8 homologues (MIP-2 and KC) in mice (Scorpio et al., 2004). These chemokines are suggested to be important in *A. phagocytophilum* pathogenesis by inducing trafficking of neutrophils to the sites of infection via binding to receptors in neutrophils. Signaling through *Rip2* can activate NF- $\kappa$ B target genes such as IL-8 (Buchholz & Stephens, 2006, 2008). Furthermore, *Rip2* has been previously shown to play a crucial role in neutrophil recruitment *in vivo* (Magalhaes et al., 2011). But interestingly, our study found that the levels of the chemokines (MIP-2 and KC) were un-affected in *A. phagocytophilum*-infected *Rip2*<sup>-/-</sup> mice hinting the possibility that these chemokines may not play any role in the immune defect manifested by *Rip2*<sup>-/-</sup> mice.

IFN $\gamma$ , another inflammatory cytokine, has been shown to play a very critical role in early host defense to *A. phagocytophilum* infection (Akkoyunlu & Fikrig, 2000; Dumler et al., 2000; Lepidi et al., 2000; Martin et al., 2000; Wang et al., 2004; Pedra et al., 2007a, b, 2008; Birkner et al., 2008). Our study observed a defect in the IFN- $\gamma$  and IL-18 levels in *Rip2*-deficient mice during *A. phagocytophilum* infection. Both *in vivo* and *ex vivo* data showed that the levels of IFN $\gamma$ , a major inflammatory cytokine, were significantly lower in *Rip2*<sup>-/-</sup> mice. These results are consistent with the previous reports that IFN- $\gamma$  plays a major role in the immune pathology and

early clearance of *A. phagocytophilum* infection (Akkoyunlu & Fikrig, 2000), even though it is dispensable for the complete elimination of the pathogen (Birkner *et al.*, 2008). It is also known that an adaptive CD4<sup>+</sup> T-cell-mediated response is critical for the complete clearance of *A. phagocytophilum* infection (Birkner *et al.*, 2008). Whether Rip2 plays any role in the CD4<sup>+</sup> T-cell response against *A. phagocytophilum* infection needs to be addressed in the future studies. Also, the identity of the specific cell type in which the IFN $\gamma$  production is impaired during *A. phagocytophilum* infection of the Rip2<sup>-/-</sup> mouse remains to be determined. As previous reports have shown the importance of natural killer (NK) cells, NKT cells (Choi *et al.*, 2007) and CD4<sup>+</sup>T cells (Birkner *et al.*, 2008) in the IFN $\gamma$  production and host defense to *A. phagocytophilum* infection, we speculate that Rip2 pathway could contribute to the IFN $\gamma$  production by these cell types. Although IL-12 secretion was previously shown to be dependent on Rip2 (Kobayashi *et al.*, 2002), interestingly, there was no difference in IL-12 in Rip2<sup>-/-</sup> mouse when challenged with *A. phagocytophilum*. But the levels of the inflammasome-dependent cytokine, IL-18, was less in infected Rip2<sup>-/-</sup> animals. It is also intriguing that even though the bacterial load in Rip2<sup>-/-</sup> mice became significantly different from controls on day 7 onwards, the difference in the levels of IFN $\gamma$  and IL-18 in Rip2<sup>-/-</sup> mice became more prominent only at day 10 post-infection. This hints to the possibility that Rip2 may also have a role independent of IFN $\gamma$  and IL-18. Future studies are required to delineate the mechanism.

As Rip2 is not a PRR but mediates the innate immune response by acting as an adaptor for the innate immune receptors Nod1 and Nod2, it will be important to identify the receptor that detects *A. phagocytophilum* and signals through Rip2. The role for Rip2 in the immune response to *A. phagocytophilum* is rather unexpected, given the fact that the genome of *A. phagocytophilum* is reported to lack the genes encoding peptidoglycan, the known ligand for Nod1/2. So it is unlikely that the role of Rip2 in the immune response to *A. phagocytophilum* infection is linked to mechanisms involving peptidoglycan sensing. This leaves us with a major question as to which mechanism *A. phagocytophilum* uses to activate Rip2-mediated immune response. Our speculation would be that (1) a non-peptidoglycan microbial component (e.g. virulence factor) or (2) endogenous danger-associated molecular patterns (DAMPs, e.g. High-mobility group box proteins, heparin sulfate, ATP, DNA etc.; Chen & Nunez, 2010) that are released by damaged host cells during infection could potentially play roles in activating Rip2 during *A. phagocytophilum* invasion. As a precedence for the first hypothesis, a *Salmonella* type III secretion system effector was recently identified to activate Nod/Rip2 signaling pathway (Keestra *et al.*, 2011). *Anaplasma phagocytophilum* is also known to

possess a functional type IV secretion system (Rikihisa *et al.*, 2010). Previous studies also reported that DAMPs can initiate signaling through innate immune receptors such as TLRs (Yanai *et al.*, 2009) and NLRs (Petrilli *et al.*, 2007; Benko *et al.*, 2008). It is also possible that Rip2 may interact or act synergistically with other molecules that have been previously associated with *A. phagocytophilum* clearance such as the inflammasome NLR proteins NLRC4, Asc, or Caspase 1, thereby leading to the delayed immune clearance. Supporting this possibility are previous reports showing the interaction of Rip2 pathway with Asc and caspase1 pathway (Sarkar *et al.*, 2006; Pan *et al.*, 2007). In addition, the observation that the production of inflammasome-dependent cytokine IL-18 was less in *A. phagocytophilum*-infected Rip2 knockout mice again hints toward a possibility of cross-talk between Rip2 and inflammasome pathways during *A. phagocytophilum* infection. Further studies are required to delineate the underlying mechanisms.

In conclusion, our studies revealed a previously unanticipated role for Rip2<sup>-/-</sup> in the immune clearance of *A. phagocytophilum*. This study thus provides novel insights into the mechanisms underlying immune response to the infection by *A. phagocytophilum*.

## Acknowledgements

The authors would like to thank Debbie Beck for assistance with mice studies. We also thank Prof. Yasuko Rikihisa for providing *A. phagocytophilum* strain HZ for the studies. This work was supported by grants from the NIH. The authors have no conflict of interest to declare.

## References

- Akkoyunlu M & Fikrig E (2000) Gamma interferon dominates the murine cytokine response to the agent of human granulocytic ehrlichiosis and helps to control the degree of early rickettsiaemia. *Infect Immun* **68**: 1827–1833.
- Akkoyunlu M, Malawista SE, Anguita J & Fikrig E (2001) Exploitation of interleukin-8-induced neutrophil chemotaxis by the agent of human granulocytic ehrlichiosis. *Infect Immun* **69**: 5577–5588.
- Archer KA, Ader F, Kobayashi KS, Flavell RA & Roy CR (2010) Cooperation between multiple microbial pattern recognition systems is important for host protection against the intracellular pathogen *Legionella pneumophila*. *Infect Immun* **78**: 2477–2487.
- Bakken JS & Dumler JS (2000) Human granulocytic ehrlichiosis. *Clinical Infectious Diseases: an official publication of the Infectious Diseases Society of America* **31**: 554–560.
- Balamayooran T, Batra S, Balamayooran G, Cai S, Kobayashi KS, Flavell RA & Jeyaseelan S (2011) Receptor-interacting

- protein 2 controls pulmonary host defense to *Escherichia coli* infection via the regulation of interleukin-17A. *Infect Immun* **79**: 4588–4599.
- Banerjee R, Anguita J & Fikrig E (2000) Granulocytic ehrlichiosis in mice deficient in phagocyte oxidase or inducible nitric oxide synthase. *Infect Immun* **68**: 4361–4362.
- Benko S, Philpott DJ & Girardin SE (2008) The microbial and danger signals that activate Nod-like receptors. *Cytokine* **43**: 368–373.
- Birkner K, Steiner B, Rinkler C, Kern Y, Aichele P, Bogdan C & von Loewenich FD (2008) The elimination of *Anaplasma phagocytophilum* requires CD4<sup>+</sup> T cells, but is independent of Th1 cytokines and a wide spectrum of effector mechanisms. *Eur J Immunol* **38**: 3395–3410.
- Borjesson DL & Barthold SW (2002) The mouse as a model for investigation of human granulocytic ehrlichiosis: current knowledge and future directions. *Comp Med* **52**: 403–413.
- Buchholz KR & Stephens RS (2006) Activation of the host cell proinflammatory interleukin-8 response by *Chlamydia trachomatis*. *Cell Microbiol* **8**: 1768–1779.
- Buchholz KR & Stephens RS (2008) The cytosolic pattern recognition receptor NOD1 induces inflammatory interleukin-8 during *Chlamydia trachomatis* infection. *Infect Immun* **76**: 3150–3155.
- Bunnell JE, Trigiani ER, Srinivas SR & Dumler JS (1999) Development and distribution of pathologic lesions are related to immune status and tissue deposition of human granulocytic ehrlichiosis agent-infected cells in a murine model system. *J Infect Dis* **180**: 546–550.
- Carlyon JA & Fikrig E (2003) Invasion and survival strategies of *Anaplasma phagocytophilum*. *Cell Microbiol* **5**: 743–754.
- Carlyon JA, Abdel-Latif D, Pypaert M, Lacy P & Fikrig E (2004) *Anaplasma phagocytophilum* utilizes multiple host evasion mechanisms to thwart NADPH oxidase-mediated killing during neutrophil infection. *Infect Immun* **72**: 4772–4783.
- Chen GY & Nunez G (2010) Sterile inflammation: sensing and reacting to damage. *Nat Rev Immunol* **10**: 826–837.
- Chin AI, Dempsey PW, Bruhn K, Miller JF, Xu Y & Cheng G (2002) Involvement of receptor-interacting protein 2 in innate and adaptive immune responses. *Nature* **416**: 190–194.
- Choi KS, Webb T, Oelke M, Scorpio DG & Dumler JS (2007) Differential innate immune cell activation and proinflammatory response in *Anaplasma phagocytophilum* infection. *Infect Immun* **75**: 3124–3130.
- Dumler JS, Trigiani ER, Bakken JS, Aguero-Rosenfeld ME & Wormser GP (2000) Serum cytokine responses during acute human granulocytic ehrlichiosis. *Clin Diagn Lab Immunol* **7**: 6–8.
- Dumler JS, Choi KS, Garcia-Garcia JC, Barat NS, Scorpio DG, Garyu JW, Grab DJ, Bakken JS (2005) Human granulocytic anaplasmosis and *Anaplasma phagocytophilum*. *Emerg Infect Dis* **11**: 1828–1834.
- Dunning Hotopp JC, Lin M, Madupu R *et al.* (2006) Comparative genomics of emerging human ehrlichiosis agents. *PLoS Genet* **2**: e21.
- Franchi L, Warner N, Viani K & Nunez G (2009) Function of Nod-like receptors in microbial recognition and host defense. *Immunol Rev* **227**: 106–128.
- Hodzic E, Ijdo JW, Feng S *et al.* (1998) Granulocytic ehrlichiosis in the laboratory mouse. *J Infect Dis* **177**: 737–745.
- Inohara N & Nunez G (2003) NODs: intracellular proteins involved in inflammation and apoptosis. *Nat Rev Immunol* **3**: 371–382.
- Keestra AM, Winter MG, Klein-Douwel D *et al.* (2011) A Salmonella virulence factor activates the NOD1/NOD2 signaling pathway. *mBio* **2**(6): e00266–11.
- Kobayashi K, Inohara N, Hernandez LD *et al.* (2002) RICK/Rip2/CARDIAK mediates signalling for receptors of the innate and adaptive immune systems. *Nature* **416**: 194–199.
- Kobayashi KS, Chamaillard M, Ogura Y, Henegariu O, Inohara N, Nunez G & Flavell RA (2005) Nod2-dependent regulation of innate and adaptive immunity in the intestinal tract. *Science* **307**: 731–734.
- Lepidi H, Bunnell JE, Martin ME, Madigan JE, Stuen S & Dumler JS (2000) Comparative pathology, and immunohistology associated with clinical illness after *Ehrlichia phagocytophila*-group infections. *The American journal of tropical medicine and hygiene* **62**: 29–37.
- Magalhaes JG, Lee J, Geddes K, Rubino S, Philpott DJ & Girardin SE (2011) Essential role of Rip2 in the modulation of innate and adaptive immunity triggered by Nod1 and Nod2 ligands. *Eur J Immunol* **41**: 1445–1455.
- Martin ME, Bunnell JE & Dumler JS (2000) Pathology, immunohistology, and cytokine responses in early phases of human granulocytic ehrlichiosis in a murine model. *J Infect Dis* **181**: 374–378.
- Pan Q, Mathison J, Fearn C *et al.* (2007) MDP-induced interleukin-1 $\beta$  processing requires Nod2 and CIAS1/NALP3. *J Leukoc Biol* **82**: 177–183.
- Pedra JH, Sutterwala FS, Sukumaran B *et al.* (2007a) ASC/PYCARD and caspase-1 regulate the IL-18/IFN- $\gamma$  axis during *Anaplasma phagocytophilum* infection. *Journal of immunology* **179**: 4783–4791.
- Pedra JH, Tao J, Sutterwala FS *et al.* (2007b) IL-12/23p40-dependent clearance of *Anaplasma phagocytophilum* in the murine model of human anaplasmosis. *FEMS Immunol Med Microbiol* **50**: 401–410.
- Pedra JH, Mattner J, Tao J *et al.* (2008) c-Jun NH2-terminal kinase 2 inhibits gamma interferon production during *Anaplasma phagocytophilum* infection. *Infect Immun* **76**: 308–316.
- Petrilli V, Dostert C, Muruve DA & Tschopp J (2007) The inflammasome: a danger sensing complex triggering innate immunity. *Curr Opin Immunol* **19**: 615–622.
- Rikihisa Y, Lin M & Niu H (2010) Type IV secretion in the obligatory intracellular bacterium *Anaplasma phagocytophilum*. *Cell Microbiol* **12**: 1213–1221.
- Sarkar A, Duncan M, Hart J, Hertlein E, Guttridge DC & Wewers MD (2006) ASC directs NF- $\kappa$ B activation by regulating receptor interacting protein-2 (RIP2) caspase-1 interactions. *Journal of immunology* **176**: 4979–4986.



- Scorpio DG, Akkoyunlu M, Fikrig E & Dumler JS (2004) CXCR2 blockade influences *Anaplasma phagocytophilum* propagation but not histopathology in the mouse model of human granulocytic anaplasmosis. *Clin Diagn Lab Immunol* **11**: 963–968.
- Shimada K, Chen S, Dempsey PW *et al.* (2009) The NOD/RIP2 pathway is essential for host defenses against *Chlamydomphila pneumoniae* lung infection. *PLoS Pathog* **5**: e1000379.
- Sukumaran B, Carlyon JA, Cai JL, Berliner N & Fikrig E (2005) Early transcriptional response of human neutrophils to *Anaplasma phagocytophilum* infection. *Infect Immun* **73**: 8089–8099.
- Sun W, JW IJ, Telford SR 3rd, Hodzic E, Zhang Y, Barthold SW & Fikrig E (1997) Immunization against the agent of human granulocytic ehrlichiosis in a murine model. *J Clin Invest* **100**: 3014–3018.
- Telford SR 3rd, Dawson JE, Katavolos P, Warner CK, Kolbert CP & Persing DH (1996) Perpetuation of the agent of human granulocytic ehrlichiosis in a deer tick-rodent cycle. *Proc Nat Acad Sci USA* **93**: 6209–6214.
- von Loewenich FD, Scorpio DG, Reischl U, Dumler JS & Bogdan C (2004) Frontline: control of *Anaplasma phagocytophilum*, an obligate intracellular pathogen, in the absence of inducible nitric oxide synthase, phagocyte NADPH oxidase, tumor necrosis factor, Toll-like receptor (TLR)2 and TLR4, or the TLR adaptor molecule MyD88. *Eur J Immunol* **34**: 1789–1797.
- Wang T, Akkoyunlu M, Banerjee R & Fikrig E (2004) Interferon-gamma deficiency reveals that 129Sv mice are inherently more susceptible to *Anaplasma phagocytophilum* than C57BL/6 mice. *FEMS Immunol Med Microbiol* **42**: 299–305.
- Yanai H, Ban T, Wang Z *et al.* (2009) HMGB proteins function as universal sentinels for nucleic-acid-mediated innate immune responses. *Nature* **462**: 99–103.
